# Supplementary material for: Cultivating change: an evaluation of departmental readiness for faculty diversification
Source: Frontiers journal article supplement (doi:10.3389/feduc.2025.1553580), 2025-02-25
Supplement: Data_Sheet_1.docx [file Data_Sheet_1.docx]

Appendix

# Department Readiness Tool (DRT) Questions & Protocol

Adapted from Plested, Jumper-Thurman, & Edwards, 2016.

## Interviewer Instructions

- Contact the people you have identified and see if they would be willing to discuss the issue. Each interview will take 30-60 minutes;
- Avoid discussion, but ask for clarification when needed and use prompts as designated;
- Record or write responses as they are given. Try not to add your own interpretation or second guess what the interviewee meant;
- Document all responses as accurately as possible;
- Ask questions exactly as written; avoid interjecting personal bias or opinions;
- There are no right or wrong answers; no good or bad interviews—all provide information;
- **BOLDED questions** are the required priority questions. Other questions can be asked if time permits;
- When you see (Department) in the text, substitute the appropriate department name or use “the department” or “your Department.”

## Departmental Efforts

*Interviewer:*

For the following questions, please answer keeping in mind your perspective of what departmental members believe and not what you personally believe.

**On a scale from 1 to 10, how much of a concern is the recruitment and retention of diverse faculty to members of *(Department),* with 1 being “not a concern at all” and 10 being “a very great concern”?**

**Can you tell me why you think it’s at that level?**

## Knowledge of Efforts

*Reminder to Interviewer: Please ensure that the respondent answers this question in regard to* ***departmental members,*** *not in regard to themselves or what they think it should be.*

*Interviewer:*

I’m going to ask you about current departmental efforts to address *the recruitment and retention of diverse faculty*. By efforts, I mean any programs, activities, or services in your department that address *the recruitment and retention of diverse faculty*.

**Are there efforts in (*Department)* that address the recruitment and retention of diverse faculty?** (*If Yes, continue to question 4; if No, skip to question 18.)*

**Can you briefly describe each of these?**

*Interviewer: Write down names of efforts so that you can refer to them in #4-5 below.*

How long have each of these efforts been going on? Probe for each program/activity.

Who do each of these efforts serve (e.g., a certain age group, ethnicity, etc.)?

**About how many Departmental members are aware of each of the following aspects of the efforts - none, a few, some, many, or most?**

- - **Have heard of efforts?**
  - **Can name efforts?**
  - **Know the purpose of the efforts?**
  - **Know who the efforts are for?**
  - **Know how the efforts work (e.g. activities or how they're implemented)?**
  - **Know the effectiveness of the efforts.**

1. **Thinking back to your answers, why do you think members of your Department have this amount of knowledge?**
2. **Are there misconceptions or incorrect information among Departmental members about the current efforts?** *If yes:* What are these?
3. How do Departmental members learn about the current efforts?
4. Do Departmental members view current efforts as successful?
5. *Probe:* What do Departmental members like about these programs? What don't they like?
6. What are the obstacles to individuals participating in these efforts?
7. What are the strengths of these efforts?
8. What are the weaknesses of these efforts?
9. Are the evaluation results being used to make changes in efforts or to start new ones?
10. What planning for additional efforts to address the recruitment and retention of diverse faculty is going on in (*Department)*?
11. *(Only ask if the respondent answered “No” to #3 or was unsure.)* **Is anyone in (*Department)* trying to get something started to address the recruitment and retention of diverse faculty? Can you tell me about that?**

## Leadership

*Interviewer:* I’m going to ask you how the leadership in *(Department)* perceives *the recruitment and retention of diverse faculty*. By leadership, we are referring to those who could affect the outcome of this issue and those who have influence in the Department and/or who lead the Department in helping it achieve its goals.

1. **Using a scale from 1 to 10, how much of a concern is** the recruitment and retention of diverse faculty **to the leadership of (*Department)*, with 1 being “not a concern at all” and 10 being “a very great concern”?**

**Can you tell me why you say it’s ?**

19a. **How much of a priority is addressing the recruitment and retention of diverse faculty to leadership? Can you explain why you say this?**

1. **I’m going to read a list of ways that leadership might show its support or lack of support for efforts to address *the recruitment and retention of diverse faculty.*****Can you please tell me whether none, a few, some, many, or most leaders would or do show support in this way? Feel free to explain your responses as we move through the list.**

**How many leaders (a few, some, many, or most):**

- 1. **At least passively support efforts without necessarily being active in that support?**
  2. **Participate in developing, improving, or implementing efforts, for example by being a member of a group that is working toward these efforts?**
  3. **Support allocating resources to fund departmental efforts?**
  4. **Play a key role as a leader or driving force in planning, developing, or implementing efforts? (prompt: How do they do that?)**
  5. **Play a key role in ensuring the long-term viability of departmental efforts, for example, by allocating long-term funding?**

1. **Does the leadership support expanded efforts in the Department to address *the recruitment and retention of diverse faculty?***

***If******yes****:* **How do they show this support? For example, by passively supporting, by being involved in developing the efforts, or by being a driving force or key player in achieving these expanded efforts?**

1. Who are leaders that are supportive of addressing this issue in your department?
2. Are there leaders who might oppose addressing the recruitment and retention of diverse faculty? How do they show their opposition?

## Departmental Climate

*Interviewer:* For the following questions, again please answer keeping in mind your perspective of what departmental members believe and not what you personally believe.

1. **How much of a priority is addressing this issue to Departmental members? Can you explain your answer?**

*Interviewer:* **I’m going to read a list of ways that departmental members might show their support or their lack of support for departmental efforts to address *the recruitment and retention of diverse faculty.***

1. **Can you please tell me whether none, a few, some, many, or most departmental members would or do show their support in this way? Feel free to explain your responses as we move through the list.**

**How many Departmental members... (none, a few, some, many or most)?**

- 1. **At least passively support Departmental efforts the recruitment and retention of diverse faculty. without being active in that support?**
  2. **Participate in developing, improving or implementing efforts, for example by attending group meetings that are working toward these efforts?**
  3. **Play a key role as a leader or driving force in planning, developing or implementing efforts? (prompt: How do they do that?)**
  4. **Are willing to pay more (for example, in taxes) to help fund Departmental efforts?**

1. **About how many departmental members would support expanding efforts in the department to address the recruitment and retention of diverse faculty? Would you say none, a few, some, many, or most?**

***If many or most:* How might they show this support, e.g., passively or actively by being involved? *If none:* Howmight they show this support, e.g., passively or actively by being involved?**

1. Are there departmental members who oppose or might oppose the department’s investment in *the recruitment and retention of diverse faculty?* How do or will they show their opposition?
2. Are there ever any circumstances in which members of (*Department)* might think that this issue should be tolerated? In other words, are there departmental members who might tolerate (but not truly support) efforts to address the recruitment and retention of diverse faculty? Please explain.
3. Do department members celebrate or critique any groups who support or advocate for increasing recruitment and retention of diverse faculty?

## Knowledge of the Issue

1. On a scale of 1 to 10, where a 1 is no knowledge and a 10 is detailed knowledge, how much do departmental members know about *the recruitment and retention of diverse faculty?*

Why do you say it’s a ?

1. **Would you say that departmental members know nothing, a little, some, or a lot about each of the following as they pertain to *the recruitment and retention of diverse faculty?*** (*After each item, have them answer)*
   1. **The recruitment and retention of diverse faculty, in general.** *(Prompt as needed with nothing, a little, some, or a lot.)*
   2. **The signs and symptoms of *the need for recruitment and retention of diverse faculty in the department?***
   3. **The causes for *the need for recruitment and retention of diverse faculty in the department?***
   4. **The consequences of *recruitment and retention of diverse faculty?***
   5. **How much *recruitment and retention of diverse faculty* occurs locally?**
   6. **What can be done to prevent or treat *the need for recruitment and retention of diverse faculty?***
   7. **The effects of the *recruitment and retention of diverse faculty* on students, staff, and faculty in the department?**
2. **What are the misconceptions among departmental members *about the recruitment and retention of diverse faculty*, e.g., why it occurs, how much it occurs locally, or what the consequences are?**
3. What type of information is available in the (*Department)* about *the recruitment and retention of diverse faculty* (e.g., newspaper articles, journal articles, conference poster presentations, staff meetings)?

*Interviewer: If they list information, ask:* Do departmental members have access to and/or use this information?

## Resources

*Interviewer: If there are efforts to address the issue locally, begin with question 34. If there are no efforts, go to question 38.*

1. **How are current efforts funded? Is this funding likely to continue into the future?**
2. **I’m now going to read you a list of resources that could be used to address *the recruitment and retention of diverse faculty* in your Department. For each of these, please indicate whether there is *none, a little, some or a lot* of that resource available in your department that could be used to address *the recruitment and retention of diverse faculty*?**
   1. **Volunteers?**
   2. **Financial donations from organizations and/or businesses?**
   3. **Grant funding?**
   4. **Experts?**
   5. **Space?**
3. **Would departmental members and leadership support using these resources to address *the recruitment and retention of diverse faculty*? Please explain.**
4. **On a scale of 1 to 5, where 1 is no effort and 5 is a great effort, how much effort are departmental members and/or leadership putting into doing each of the following things to increase the resources going toward addressing *the recruitment and retention of diverse faculty* in your department?**
   1. **Seeking volunteers for current or future efforts to address the recruitment and retention of diverse faculty in the department.**
   2. **Soliciting donations from businesses or other organizations to fund current or expanded departmental efforts.**
   3. **Writing grant proposals to obtain funding to address the recruitment and retention of diverse faculty in the department.**
   4. **Training departmental members to become experts.**
   5. **Recruiting experts to the department.**
5. **Are you aware of any proposals or action plans that have been submitted for funding to address *the recruitment and retention of diverse faculty* in the department? *If Yes:* Please explain.**
6. What formal or informal policies, practices, and laws related to this issue are in place in your department? (*Prompt*: An example of formal would be established policies of schools, police, or courts, such as Title IX. An example of informal would be similar to the police not responding to calls from a particular part of town.)
7. Are there segments of the department for which these policies, practices, and laws may not apply, for example, due to tenure status, administrative position, socioeconomic status, ethnicity, seniority, specialization, age?
8. Is there a need to expand these policies, practices, and laws? If so, are there plans to expand them? Please explain.
9. How does the department view these policies, practices, and laws?

## Anchored Rating Scales for Scoring Each Dimension

### Existing Department Efforts

1. No awareness of the need for efforts to address “this issue” in any capacity.
2. No efforts addressing “this issue.”
3. A few individuals recognize the need to initiate some type of effort, but there is no immediate motivation to do anything.
4. Some department members have met and have begun a discussion of developing department efforts.
5. Efforts (programs/activities) are being planned.
6. Efforts (programs/activities) have been implemented.
7. Efforts (programs/activities) have been running for at least four years.
8. Several different programs, activities, and policies are in place, covering different age groups and reaching a wide range of people. New efforts are being developed based on evaluation data.
9. Evaluation plans are routinely used to test the effectiveness of many different efforts, and the results are being used to make changes and improvements.

### Department Knowledge of the Efforts

1. Department has no knowledge of the need for efforts addressing “this issue.”
2. Department has no knowledge about efforts addressing “this issue.”
3. A few members of the department have heard about efforts, but the extent of their knowledge is limited.
4. Some members of the department know about local/departmental efforts.
5. Members of the department have basic knowledge about local/departmental efforts (e.g., purpose).
6. An increasing number of department members have knowledge of local/departmental efforts and are trying to increase the knowledge of the general department about these efforts.
7. There is evidence that the department has specific knowledge of local/departmental efforts including contact persons, training of staff, clients involved, etc.
8. There is considerable department knowledge about different department efforts, as well as the level of program effectiveness.
9. Department has knowledge of program evaluation data on how well the different local/departmental efforts are working and their benefits and limitations.

### Leadership (appointed leaders & influential department members)

1. Leadership has no recognition of “this issue.”
2. Leadership believes that “this issue” is not a concern in their department.
3. Leader(s) recognize(s) the need to do something regarding “this issue.”
4. Leader(s) is/are trying to get something started.
5. Leaders are part of a committee or group that addresses “this issue.”
6. Leaders are active and supportive of the implementation of efforts.
7. Leaders are supportive of continuing basic efforts and are considering resources available for self-sufficiency.
8. Leaders are supportive of expanding/improving efforts through active participation in the expansion/improvement.
9. Leaders are continually reviewing evaluation results of the efforts and are modifying support accordingly.

### Department Climate

1. The prevailing attitude is that “this issue” is not considered, unnoticed or overlooked within the department; “It’s just not our concern.”
2. The prevailing attitude is “There’s nothing we can do,” “Only ‘those’ people do that,” or “Only ‘those people’ have that.”
3. Department climate is neutral, disinterested, or believes that “this issue” does not affect the department as a whole.
4. The attitude in the department is now beginning to reflect interest in “this issue”; “We have to do something, but we don’t know what to do.”
5. The attitude in the department is “We are concerned about this,” and department members are beginning to reflect modest support for efforts.
6. The attitude in the department is “This is our responsibility” and is now beginning to reflect modest involvement in efforts.
7. The majority of the department generally supports programs, activities, or policies; “We have taken responsibility.”
8. Some department members or groups may challenge specific programs, but the department in general is strongly supportive of the need for efforts. Participation level is high; “We need to keep up on this issue and make sure what we are doing is effective.”
9. All major segments of the department are highly supportive, and department members are actively involved in evaluating and improving efforts and demand accountability.

### Department Knowledge About the Issue

- 1. “This issue” is not viewed as an issue that we need to know about.
  2. No knowledge about “this issue”.
  3. A few in the department have basic knowledge of “this issue” and recognize that some people here may be affected by the issue.
  4. Some department members have basic knowledge and recognize that “this issue” occurs local/departmentally, but information and/or access to information is lacking.
  5. Some department members have basic knowledge of “this issue,” including modes of transmission, means of prevention. General information on “this issue” is available.
  6. A majority of department members have basic knowledge of “this issue,” including modes of transmission, means of prevention, understanding of high-risk groups and behaviors, and that it occurs local/departmentally. There are specific local/departmental data on “this issue” available.
  7. Department members have knowledge of, and access to, detailed information about the recruitment and retention of diverse faculty why it occurs, how much it occurs local/departmentally, or what the consequences are.
  8. Department members have knowledge about prevalence, causes, risk factors, and related national or campus concerns.
  9. Department members have detailed information about “this issue” and related national or campus concerns as well as information about the effectiveness of local/departmental programs.

### Resources Related to the Issue

1. There is no awareness of the need for resources to deal with “this issue.”
2. There are no resources available for dealing with “this issue.”
3. The department is not sure what it would take (or where the resources would come from) to initiate efforts.
4. The department has individuals, organizations, and/or space available that could be used as resources.
5. Some members of the department are looking into the available resources.
6. Resources have been obtained and/or allocated for “this issue.”
7. A considerable part of the support of ongoing efforts is from local/departmental sources that are expected to provide continuous support. Department members and leaders are beginning to look at continuing efforts by accessing additional resources.
8. Diversified resources and funds are secured, and efforts are expected to be ongoing. There is additional support for further efforts.
9. There is continuous and secure support for programs and activities, evaluation is routinely expected and completed, and there are substantial resources for trying new efforts.

## Department Readiness Assessment Scoring Sheet

Scorer: Date:

**INDIVIDUAL SCORES:** Record each scorer’s independent results for each interview for each dimension. The table provides spaces for up to six interviews.

| Interviews | #1 | #2 | #3 | #4 | #5 | #6 |
| --- | --- | --- | --- | --- | --- | --- |
| Efforts |  |  |  |  |  |  |
| Knowledge of Efforts |  |  |  |  |  |  |
| Leadership |  |  |  |  |  |  |
| Climate |  |  |  |  |  |  |
| Knowledge of Issue |  |  |  |  |  |  |
| Resources |  |  |  |  |  |  |

**CONSENSUS SCORES**: For each interview, the two scorers should discuss their individual scores and then agree on a single score. This is the COMBINED SCORE. Record it below and repeat for each interview in each dimension. Then *add across each row* and find the total for each dimension. Use the total to find the calculated score below.

| Interviews | #1 | #2 | #3 | #4 | #5 | #6 | TOTAL |
| --- | --- | --- | --- | --- | --- | --- | --- |
| Efforts |  |  |  |  |  |  |  |
| Knowledge of Efforts |  |  |  |  |  |  |  |
| Leadership |  |  |  |  |  |  |  |
| Climate |  |  |  |  |  |  |  |
| Knowledge of Issue |  |  |  |  |  |  |  |
| Resources |  |  |  |  |  |  |  |

CALCULATED SCORES: Use the combined score TOTAL in the table above and divide by the number of interviews conducted. Add the calculated scores together and enter it under total.

| STAGE SCORE | | | |
| --- | --- | --- | --- |
| Total Dimension | A | ÷ # of interviews = |  |
| Total Dimension | B | ÷ # of interviews = |  |
| Total Dimension | C | ÷ # of interviews = |  |
| Total Dimension | D | ÷ # of interviews = |  |
| Total Dimension | E | ÷ # of interviews = |  |
| Total Dimension | F | ÷ # of interviews = |  |
| **TOTAL calculated score** | | |  |

**OVERALL STAGE OF READINESS:** Take the **TOTAL calculated score** and divide by 6 (the number of dimensions). Use the list of stages below to match the result with a stage of readiness. *Remember, round down, not up.*

TOTAL Calculated Score ÷ 6 =

| Score | Stage of Readiness |
| --- | --- |
| 1 | No Awareness |
| 2 | Denial / Resistance |
| 3 | Vague Awareness |
| 4 | Preplanning |
| 5 | Preparation |
| 6 | Initiation |
| 7 | Stabilization |
| 8 | Confirmation / Expansion |
| 9 | High Level of Community Ownership |

COMMENTS, IMPRESSIONS, and QUALIFYING STATEMENTS about the department:
